# Supplementary material
Source: publisher figshare collection journal article supplement (https://acs.figshare.com/ndownloader/files/26428519)
Supplement: Supplementary file 1 [file 26428519]

Supporting Information for

**THz Analysis of CH<sub>3</sub>NH<sub>3</sub>PbI<sub>3</sub> Perovskites Associated with Graphene and Silver Nanowire Electrodes**

*Zhi-Wei Huang,<sup>1</sup> Yu-Heng Hong,<sup>1</sup> Yi-Jheng Du,<sup>1</sup> Ting-Jui Kuo,<sup>1</sup> Chung-Che Huang,<sup>2</sup> Tsung Sheng Kao,<sup>1\*</sup> and Hyeyoung Ahn<sup>1\*</sup>*

<sup>1</sup>Department of Photonics, College of Electrical and Computer Engineering, National Chiao Tung University, Hsinchu 30010, Taiwan.

<sup>2</sup>Optoelectronics Research Centre, University of Southampton, Southampton SO17 1BJ, UK.

\*Correspondence to: [tskao@g2.nctu.edu.tw](mailto:tskao@g2.nctu.edu.tw), [hyahn@mail.nctu.edu.tw](mailto:hyahn@mail.nctu.edu.tw)

**S1. XRD curves of MAPbI<sub>3</sub> measured at room temperature and after annealing at 90 °C**

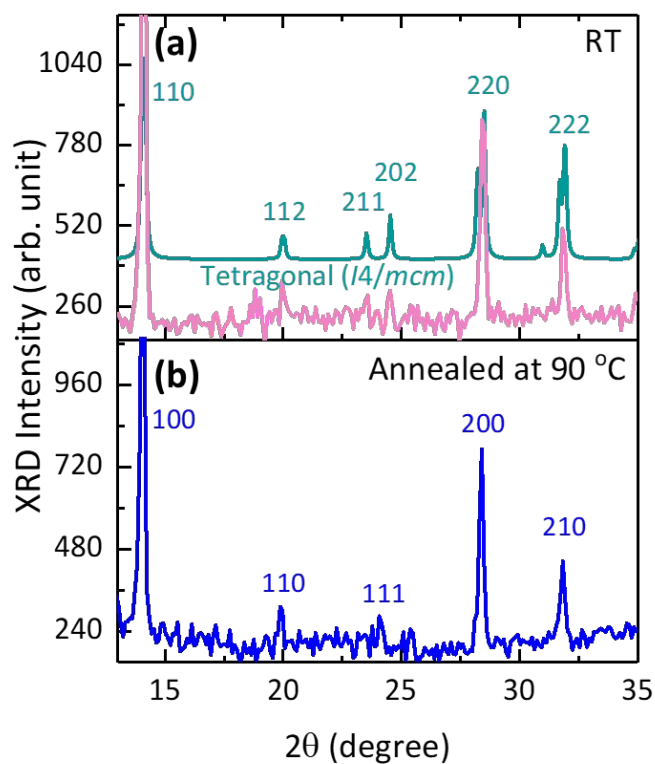

**Figure S1.** X-ray diffraction curves of as-grown MAPbI<sub>3</sub> measured **a.** at room temperature and **b.** after annealing at 90 °C in ambient atmosphere. The indexed peaks are for tetragonal phase (a) and cubic phase (b) of MAPbI<sub>3</sub>. Green curve in **a** is the calculated result of MAPbI<sub>3</sub> with the tetragonal *I4/mcm* symmetry for comparison purposes.

## S2. TEM image of MAPbI<sub>3</sub>/AgNWs and MAPbI<sub>3</sub>/Al<sub>2</sub>O<sub>3</sub>/AgNW systems

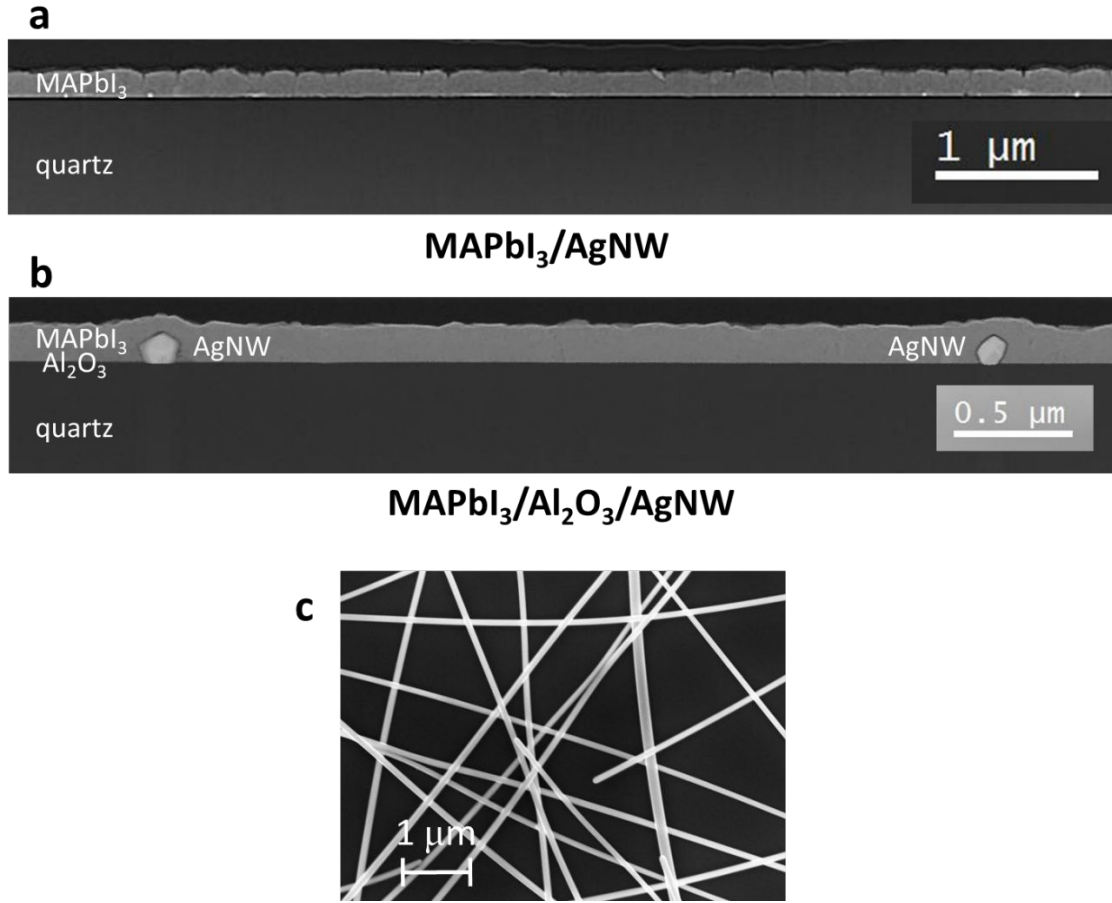

**Figure S2.** Cross-sectional TEM images of **a.** MAPbI<sub>3</sub>/AgNW and **b.** MAPbI<sub>3</sub>/Al<sub>2</sub>O<sub>3</sub>/AgNW taken at least two days after fabrication due to the preparation process of TEM measurement. While pentagonal AgNWs are clearly observed in MAPbI<sub>3</sub>/Al<sub>2</sub>O<sub>3</sub>/AgNW, no trace of AgNWs can be found in MAPbI<sub>3</sub>/AgNW. Instead, there are clear grain boundaries running through the film in MAPbI<sub>3</sub>/AgNW. **c.** SEM image of typical AgNW layer.

**Table S1.** The electrical conductivity ( $\sigma$ ) of AgNW layer covered by different thickness ( $d$ ) of  $\text{Al}_2\text{O}_3$  layer measured by the Hall measurement system.

| $d$                                 | 0 nm | 1 nm | 5 nm |
|-------------------------------------|------|------|------|
| $\sigma (\times 10^3 \text{ S/cm})$ | 1.2  | 4.0  | 3.4  |

The electrical conductivity of 1-nm  $\text{Al}_2\text{O}_3/\text{AgNW}$  is about 20 % larger than that of 5-nm  $\text{Al}_2\text{O}_3/\text{AgNW}$ . It is also larger than the bare AgNW network since the commercial AgNWs are capped by a thin polyvinylpyrrolidone layer and the ALD process at the temperature of 150 °C can remove it and improve the junction contact.

**Table S2.** The best fit parameters for Figure 3 in the text.  $\omega_p$  and  $\tau_0$  for each sample are estimated from the fitting process of complex photoconductivity with Drude and Drude-Smith model<sup>1</sup> for MAPbI<sub>3</sub>/Al<sub>2</sub>O<sub>3</sub>/AgNW and MAPbI<sub>3</sub>/AgNW, respectively. DC conductivity ( $c_{DC}$ ) at  $\omega=0$  Hz for MAPbI<sub>3</sub>/AgNW is calculated from the relation,  $c_{DC} = \epsilon_0 \omega_p^2 \tau_0 (1 + c)$ , where  $c$  is a parameter describing the fraction of the electron's original velocity after some number of scattering events and varies between  $-1$  and  $0$ .<sup>1</sup>

| Sample                                                   | $\omega_p/2\pi$<br>(THz) | $\tau_0$<br>(fs) | $c_{DC}$<br>( $\Omega^{-1}\text{cm}^{-1}$ ) |
|----------------------------------------------------------|--------------------------|------------------|---------------------------------------------|
| MAPbI <sub>3</sub> /Al <sub>2</sub> O <sub>3</sub> /AgNW | 48                       | 18               | 148                                         |
| MAPbI <sub>3</sub> /AgNW                                 | 45                       | 21               | 13                                          |

## Reference

1. Smith, N.V. Classical Generalization of the Drude Formula for the Optical Conductivity. *Phys. Rev. B* **2001**, *64*, 155106–4.
